# Supplementary material for: Opposing influences of TAC1 and LAZY1 on Lateral Shoot Orientation in Arabidopsis
Source: PubMed Central journal article supplement (PMC7142156; doi:10.1038/s41598-020-62962-4), 2020-04-08
Supplement: 41598_2020_62962_MOESM2_ESM.pdf [file 41598_2020_62962_MOESM2_ESM.pdf]

SUPPLEMENTARY DATA FOR

**Title: Opposing influences of *TAC1* and *LAZY1* on Lateral Shoot Orientation in *Arabidopsis***

Courtney A Hollender<sup>1,\*</sup>, Joseph L Hill Jr.<sup>1</sup>, Jessica Waite<sup>2,3</sup>, and Chris Dardick<sup>2</sup>

<sup>1</sup>Department of Horticulture, Michigan State University, East Lansing, MI, 48824, USA.

<sup>2</sup>USDA-ARS Appalachian Fruit Research Station, Kearneysville, WV 25430, USA.

<sup>3</sup> Current Address: Washington State University Tree Fruit Research and Extension Center, Wenatchee, WA 98801

*PromAtLAZY1::GUS*

Rosette Leaves and petioles

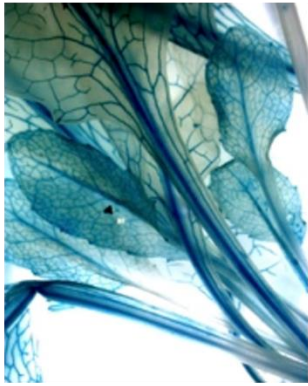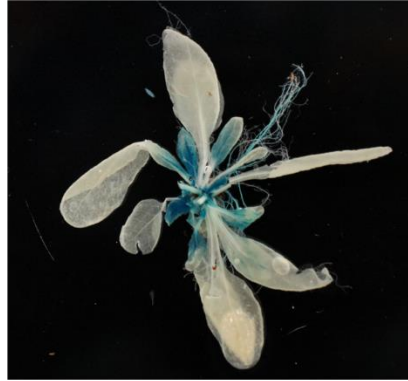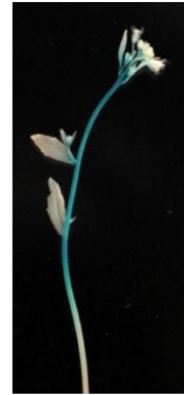

Secondary Bolt

Cauline leaves and young lateral shoots

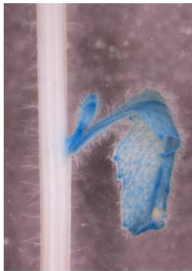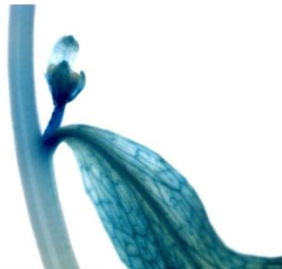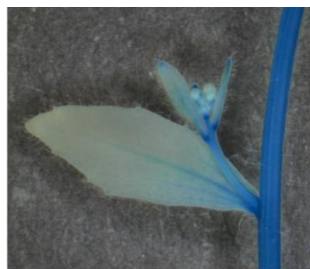

Inflorescence

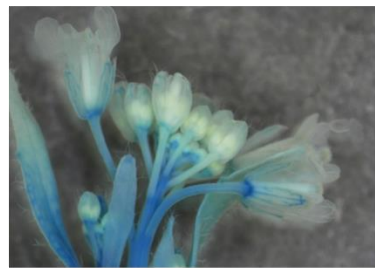

silique

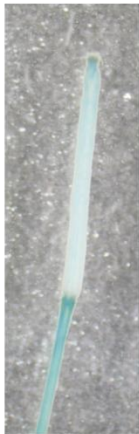

Roots from 4 week old plants

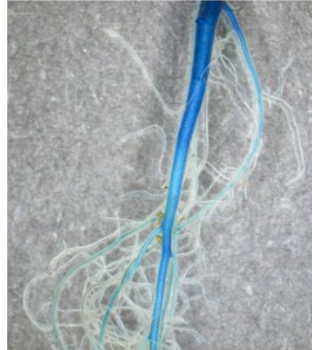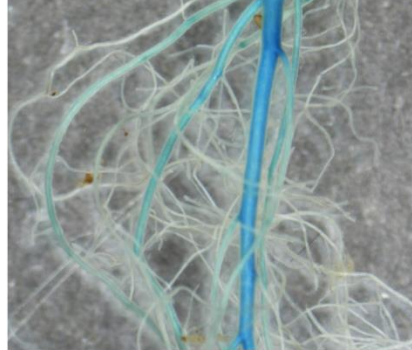

**Supplementary Figure S1.** GUS stained *PromAtLAZY1::GUS* plant tissues.

*PromAtTAC1::GUS*

Rosette Leaves and petioles

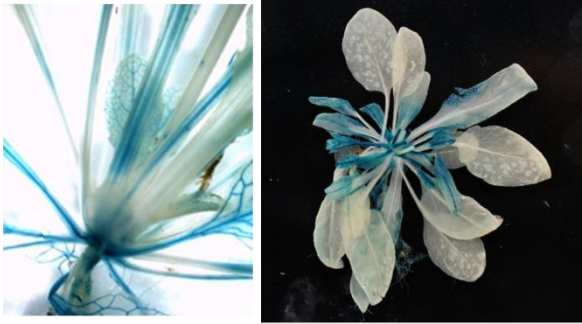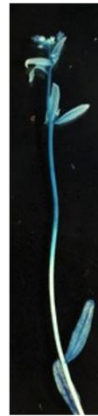

Secondary Bolt

Cauline leaves and young lateral shoot

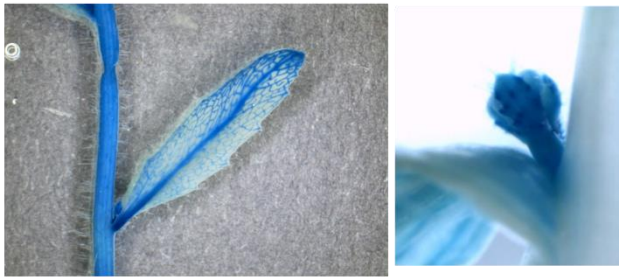

Inflorescence and siliques

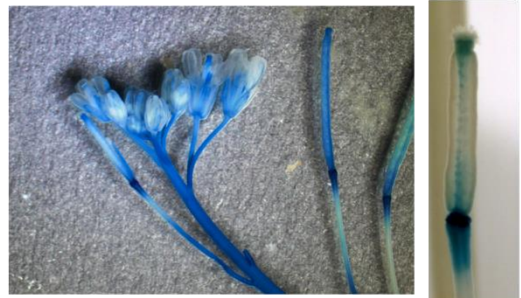

Roots from 4 week old plants

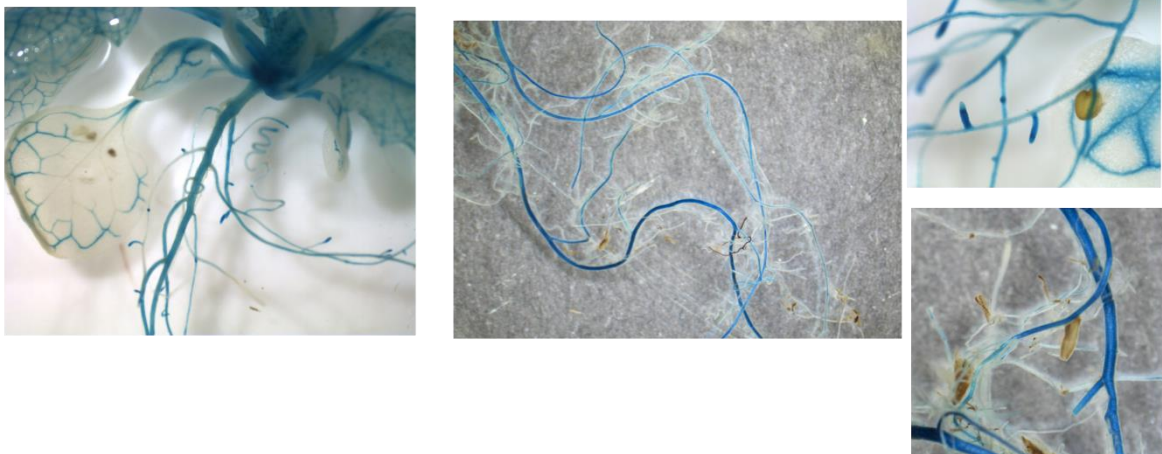

**Supplementary Figure S2** GUS stained *PromAtTAC1::GUS* plant tissues.

## A. Reorientation Experiment Set-up

1) Pots attached to custom-built rack

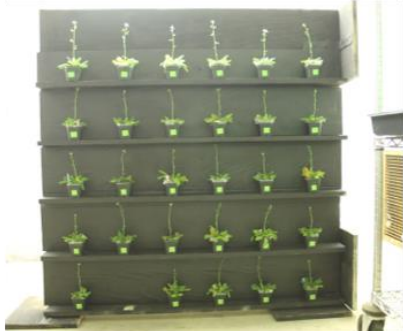

2) Acclimated to Dark (green light) for 1 hour

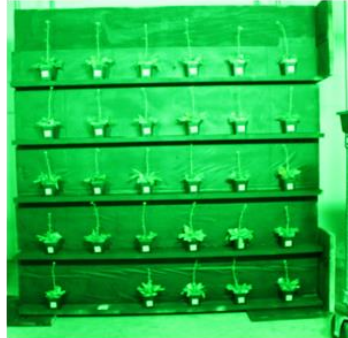

3) Rack rotated 90° and imaging started

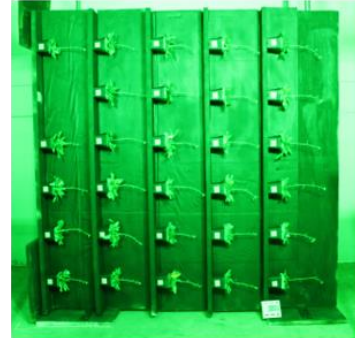

## B. Initial and twelve-hour time point images for May 5<sup>th</sup>, 2014 experiment, converted to black and white for better visualization

1 minute after reorientation

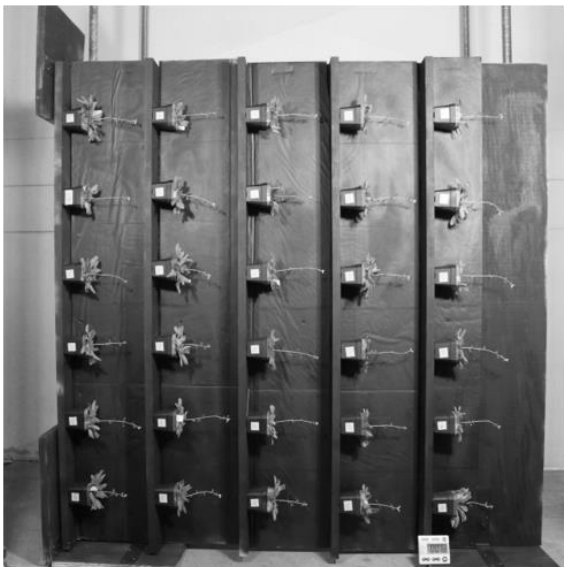

12 hours after reorientation

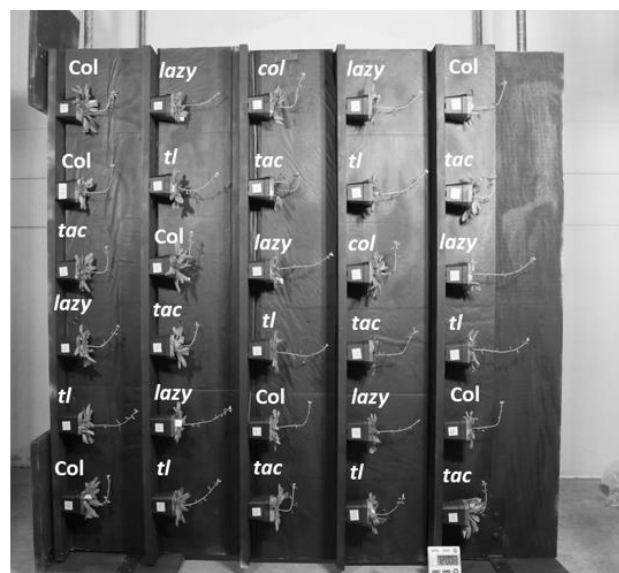

**Supplementary Figure S3. Gravitropism reorientation experimental design.** (A) Images from one of four reorientation experiments illustrating the experimental design. Plants in 2-inch pots were affixed to a custom-built rack and acclimated for 1 hour in green light (a proxy for dark conditions) before the rack was reoriented 90° clockwise. (B) Images of plants from a different reorientation experiment at 1 minute (left) and 12 hours (right) after reorientation. These images were converted to black and white for visual clarity. The genotype of each plant is written above each pot at the 12-hour time-point. LAZY1 represents *lazy1*, TAC represents *tac1*, TL represents *tac1;lazy1*, and Col represents wild type Columbia. A time-lapse video of this specific experiment can be found in Supplementary Video V1.

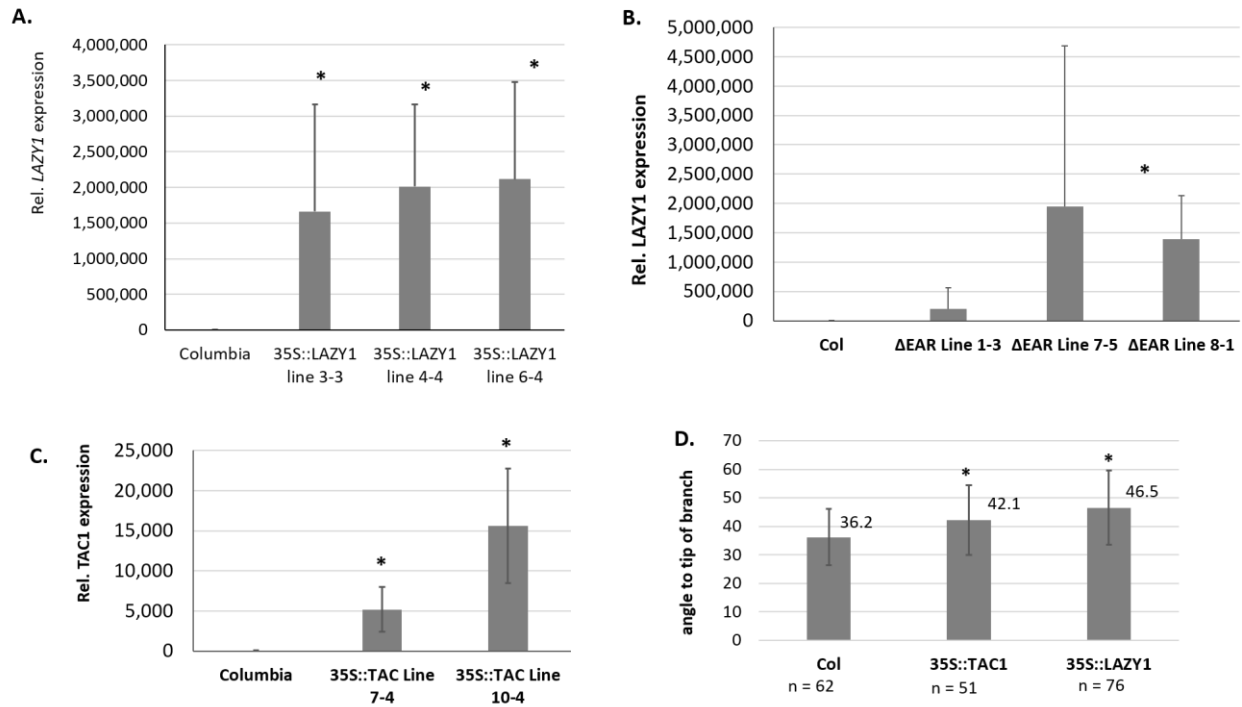

**Supplementary Figure S4. 35S::TAC1 and 35S::LAZY1 arabidopsis transgene expression and branch angle measurements.** (A-C) qPCR gene expression analysis for (A) 35S::LAZY1, (B) 35S::LAZY1  $\Delta$ EAR, and (C) 35S::TAC1 plant lines. Bars represent Standard Deviation of averages from between three and six biological replicates, each with three technical replicates. (D) Branch angle measurements for Columbia, 35S::TAC1 and 35S::LAZY1 plants, determined by measuring from the tip of the branch, just below the inflorescence, to the branch node and then up the stem to the node above. The number of angles measured is indicated below. For A-D, \* indicates significant difference compared to Col ( $p < 0.05$ ).

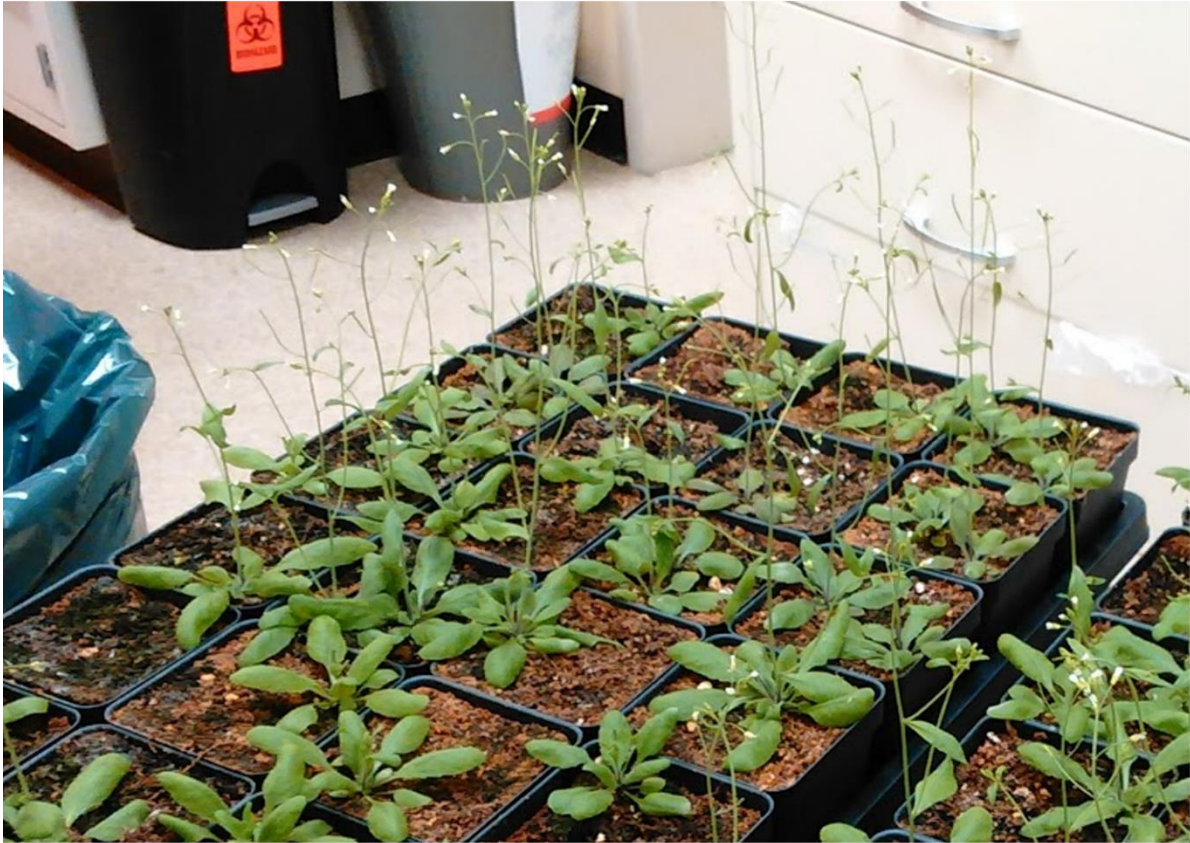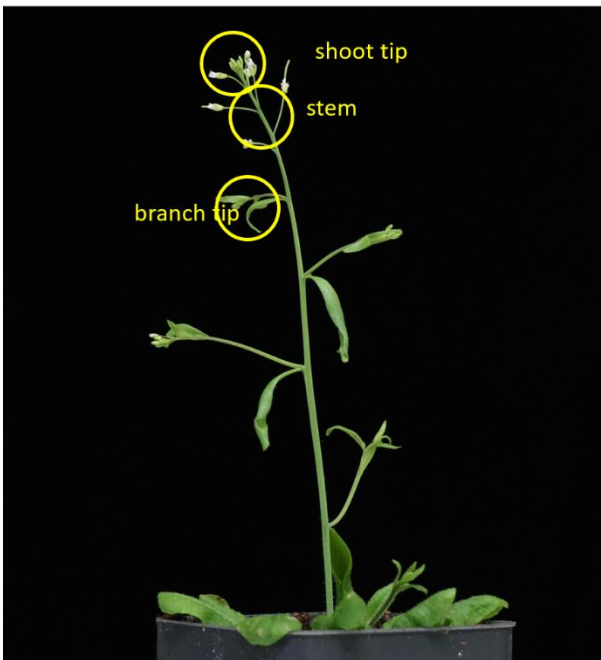

**Supplementary Figure S5.** Arabidopsis plants used for hormone analyses and tissues collection. The specific tissues harvested are indicated by yellow circles and text in bottom panel. Note: Late stage flower buds and open and senescing flowers were removed from shoot and branch tips when harvesting.

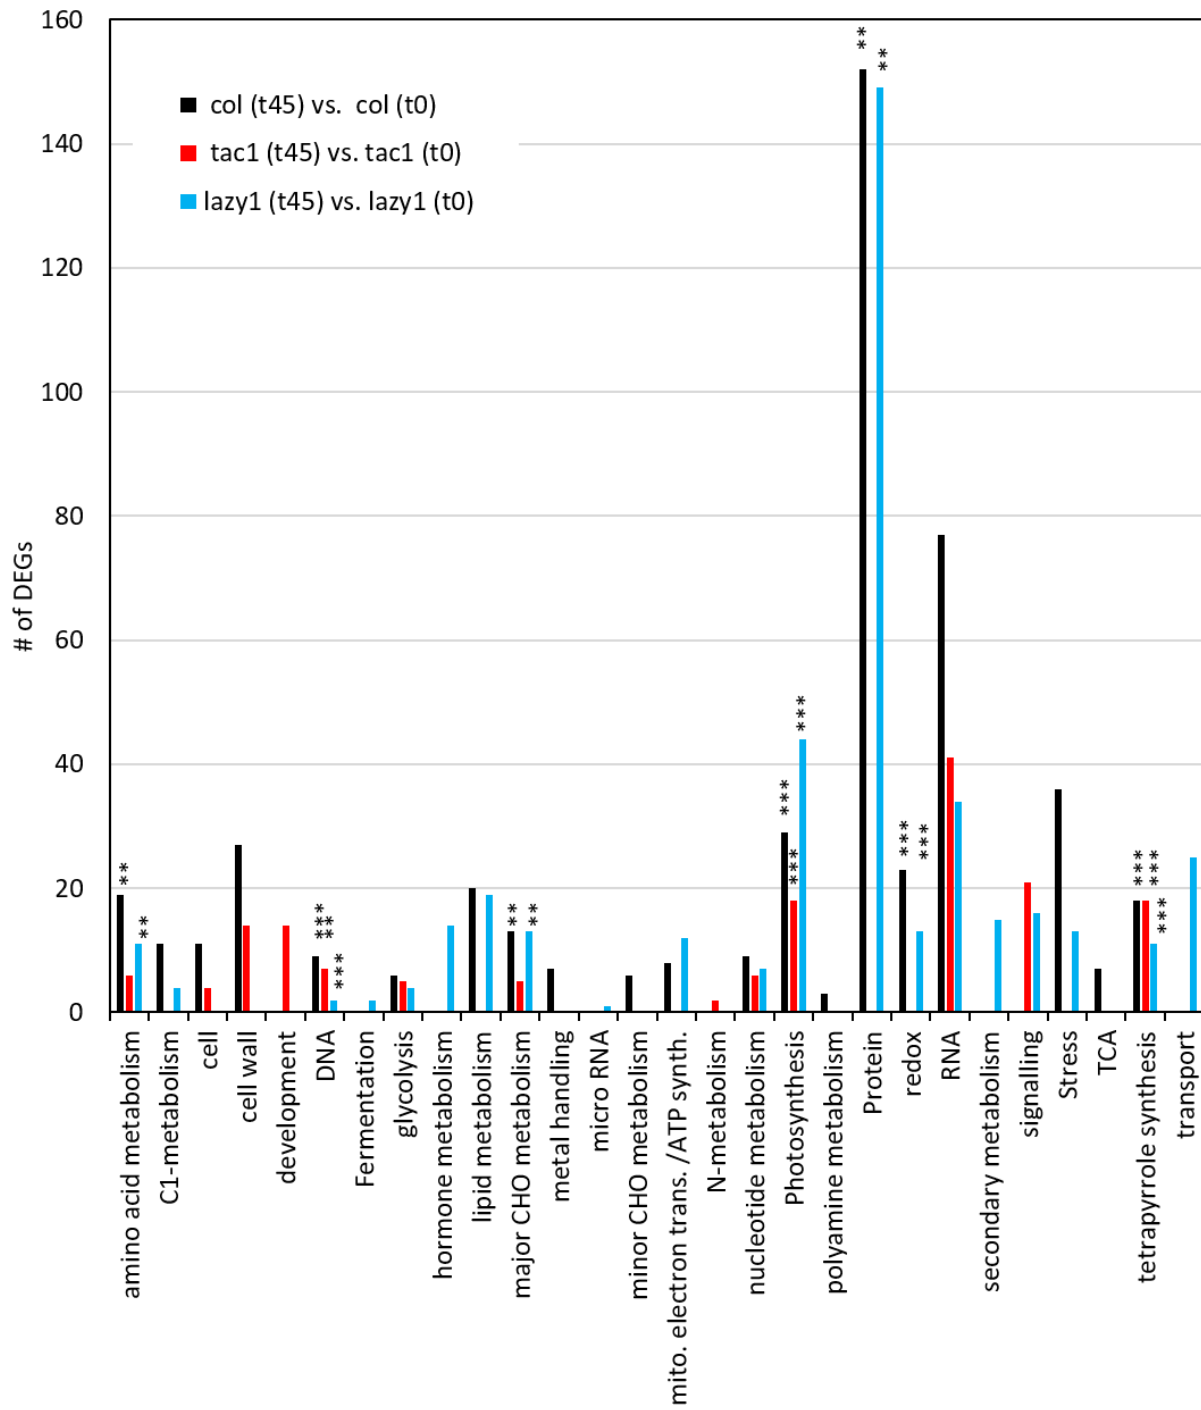

**Supplementary Figure S6.** Numbers of DEGs in the enriched MapMan categories from gravistimulated *tac1*, *lazy1* and columbia plants. Significance of each category is at least  $p < .05$  but \*\* indicates  $p < 0.0001$  ( $10e-5$ ) and \*\*\* indicates  $p < 10e-10$ .

**Table S1.** Average shoot tip angles 30 and 60 minutes after 90-degree reorientation. The p-value is from a t-test between mutant and Columbia wild type plants

| Timepoint |                       | Col          | <i>tac1</i>  | <i>lazy1</i> | <i>tac1;lazy1</i> |
|-----------|-----------------------|--------------|--------------|--------------|-------------------|
| 30 min    | 30 min. avg tip angle | <b>178.9</b> | <b>179.1</b> | <b>184.0</b> | <b>186.7</b>      |
|           | Stdev                 | 9.0          | 13.5         | 9.6          | 9.9               |
|           | SEM                   | 1.6          | 2.7          | 1.8          | 2.0               |
|           | p=value               |              | 0.935393     | 0.035347     | 0.003366          |
| 60 min    | 60 min                | <b>156.8</b> | <b>153.8</b> | <b>167.2</b> | <b>169.7</b>      |
|           | Stdev                 | 14.1         | 17.5         | 15.5         | 12.7              |
|           | SEM                   | 2.5          | 3.4          | 2.9          | 2.6               |
|           | p=value               |              | 0.487053     | 0.008011     | 0.000908          |



**Supplementary Table S2.** LC/MS/MS parameters used for hormone detection

|                            | Mass number for MRM detection |        | Ionization and collision parameters (V) |              |                  |
|----------------------------|-------------------------------|--------|-----------------------------------------|--------------|------------------|
|                            | Q1                            | Q2     | Retention Time                          | Cone Voltage | Collision Energy |
| <b>SA</b>                  | 137                           | 93     | 2.43                                    | 28           | 16               |
| <b>ABA</b>                 | 263.1                         | 153.1  | 2.75                                    | 22           | 10               |
| <b>JA</b>                  | 209.1                         | 59     | 2.98                                    | 28           | 16               |
| <b>IAA</b>                 | 176.1                         | 130.1  | 2.34                                    | 20           | 15               |
| <b>IAA-ALA</b>             | 247.13                        | 130.1  | 2.23                                    | 22           | 22               |
| <b>IAA-PHE</b>             | 323.23                        | 130.06 | 3.06                                    | 28           | 22               |
| <b>IAA-IEU</b>             | 289.26                        | 130.06 | 3.04                                    | 22           | 22               |
| <b>[D<sub>6</sub>]-ABA</b> | 269.1                         | 159.1  | 2.71                                    | 22           | 11               |
| <b>[D<sub>7</sub>]-IAA</b> | 182.98                        | 136.07 | 2.34                                    | 22           | 16               |

**Supplementary Table S3.** Numbers of RNAseq raw, trimmed, and mapped reads.

| <b>RNAseq sample name</b> | <b># of raw reads</b> | <b># of Reads after trim</b> | <b># of mapped reads</b> |
|---------------------------|-----------------------|------------------------------|--------------------------|
| t0 Col A                  | 13,520,991            | 13,406,400                   | 12,952,114               |
| t0 Col B                  | 17,795,774            | 17,604,498                   | 16,963,649               |
| t0 Col C                  | 20,319,695            | 20,098,675                   | 19,385,180               |
| t0 lazy A                 | 14,803,115            | 14,673,484                   | 14,191,130               |
| t0 lazy B                 | 20,517,452            | 20,391,149                   | 19,610,033               |
| t0 lazy 6B                | 19,005,320            | 18,920,571                   | 18,316,396               |
| t0 tac B                  | 16,333,140            | 16,173,574                   | 15,637,693               |
| t0 tac C                  | 19,195,574            | 18,993,945                   | 18,343,898               |
| t0 tac 3B                 | 20,566,598            | 20,480,277                   | 19,885,452               |
| t45 col 13                | 24,239,134            | 24,137,415                   | 23,445,786               |
| t45 col 1B                | 21,440,305            | 21,346,804                   | 20,721,204               |
| t45 col 5                 | 21,837,466            | 21,741,416                   | 21,095,877               |
| t45 col 6                 | 23,277,175            | 23,180,103                   | 22,506,013               |
| t45 lazy 13               | 18,808,385            | 18,727,725                   | 18,071,892               |
| t45 lazy 4                | 20,090,020            | 20,011,404                   | 19,402,553               |
| t45 lazy 5                | 21,946,335            | 21,857,020                   | 21,190,594               |
| t45 lazy 6                | 21,908,844            | 21,817,241                   | 20,968,353               |
| t45 tac 13                | 20,084,218            | 20,006,837                   | 19,466,051               |
| t45 tac 14                | 22,075,525            | 21,989,659                   | 21,361,020               |
| t45 tac 5                 | 17,461,498            | 17,386,021                   | 16,871,554               |
| t45 tac 6                 | 18,411,712            | 18,333,463                   | 17,828,936               |
